# Supplementary material for: Oxidase-mimicking activity of the nitrogen-doped Fe3C@C composites
Source: Royal Society of Chemistry journal article supplement (doi:10.1039/c7cc00610a), 2017-01-01
Supplement: c7cc00610a1.pdf [file c7cc00610a1.pdf]

## Supporting Information

### Oxidase-mimic activity of the nitrogen-doped Fe<sub>3</sub>C@C composites

Hankun Yang,<sup>1</sup> Lei Su,<sup>1,\*</sup> Jingyu Xiao,<sup>1</sup> Ting Feng,<sup>2</sup> Qingye Lv,<sup>3</sup> Xueji Zhang<sup>1,\*</sup>

<sup>1</sup> Beijing Key Laboratory of Bioengineering and Sensing Technology, Research Center for Bioengineering and Sensing Technology, School of Chemistry and Biological Engineering, University of Science and Technology Beijing, Beijing 100083, China.

<sup>2</sup> School of metallurgical and ecological engineering, University of Science and Technology Beijing, Beijing 100083, China.

<sup>3</sup> Department of Chemical and Petroleum Engineering, University of Calgary, Calgary, AB T2N 1N4 Canada.

\* Corresponding Author. E-mails: [sulei@ustb.edu.cn](mailto:sulei@ustb.edu.cn); [zhangxueji@ustb.edu.cn](mailto:zhangxueji@ustb.edu.cn).

## Experimental Section

### Preparation of PB cubes

PB nanocubes were prepared according to a previous literature.<sup>[1]</sup> Briefly, 38 g polyvinylpyrrolidone (PVP, K30) and 1.15 g  $\text{K}_4\text{Fe}(\text{CN})_6$  were dissolved in 500 mL of HCl solution (0.1 M) under magnetic stirring. When the solution became clear, the bottle was placed into an electric oven and heated at 80 °C for 24 h. The obtained blue product was filtered by using 0.45  $\mu\text{m}$  nylon membrane and washed several times with deionized water and absolute ethanol, then dried in a vacuum oven at 60 °C for 12 h.

### Preparation of $\text{Fe}_3\text{C}$ microboxes

The as-prepared blue product was pyrolyzed in a horizontally tubular furnace in Ar atmosphere at 550 °C for 6 h. The heating rate was 2 °C  $\text{min}^{-1}$ . The as-prepared black product was treated with 0.50 M  $\text{H}_2\text{SO}_4$  for 24 h to remove the  $\alpha$ -Fe and iron oxides possibly generated during the pyrolysis process, then washed with deionized water for five times and dried at 60 °C overnight.

### Apparatus

The crystalline phases of the products were determined using X-ray diffraction (XRD) (ARL XTRA, Thermo Electron Co.) with Cu  $\text{K}\alpha$  radiation. The morphologies of the products were observed using a field emission scanning electron microscopy (SEM, Supra 55, Zeiss, Oberkochen, Germany) and a field emission transmission electron microscopy (TEM, JEM-2100F, JEOL, Tokyo, Japan). Elemental compositions were analyzed using X-ray photoelectron spectroscopy (XPS) (AXIS ULTRA DLD, Kratos, SHIMADZU) with a monochromic Al  $\text{K}\alpha$  (1486.6 eV) as the X-ray source. UV-vis absorption spectra were recorded on a Shimadzu UV-1800 spectrometer.

### References

- [1] L. Zhang, H. B. Wu, S. Madhavi, H. H. Hng, X. W. Lou, *Journal of the American Chemical Society* 2012, 134, 17388.

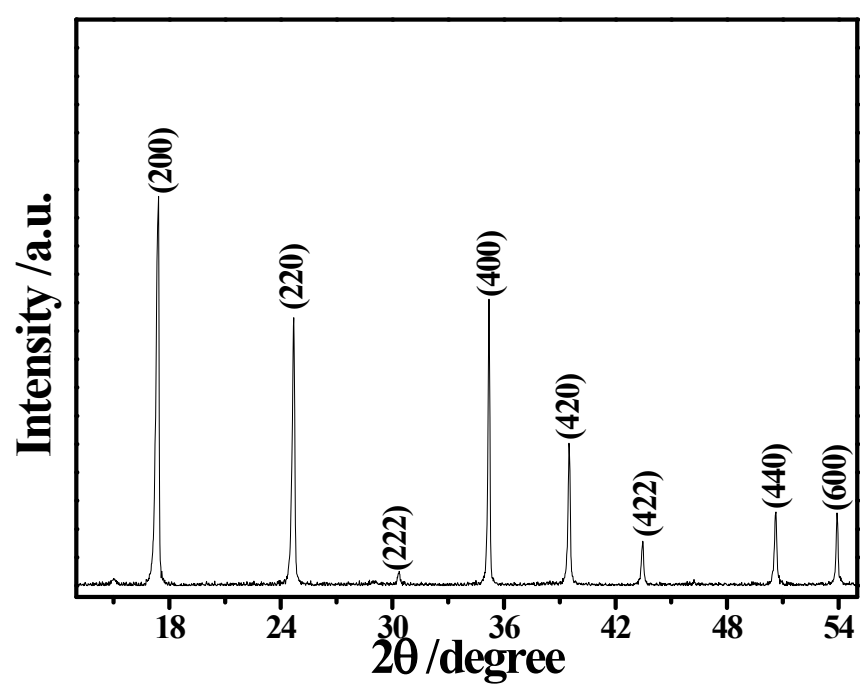

**Figure S1.** XRD pattern of the as-synthesized PB.

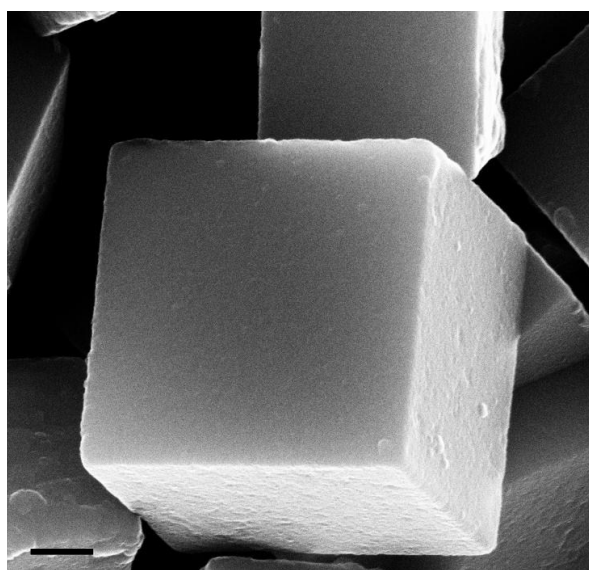

**Figure S2.** FE-SEM image of the as-synthesized PB. Scale bar: 200 nm.

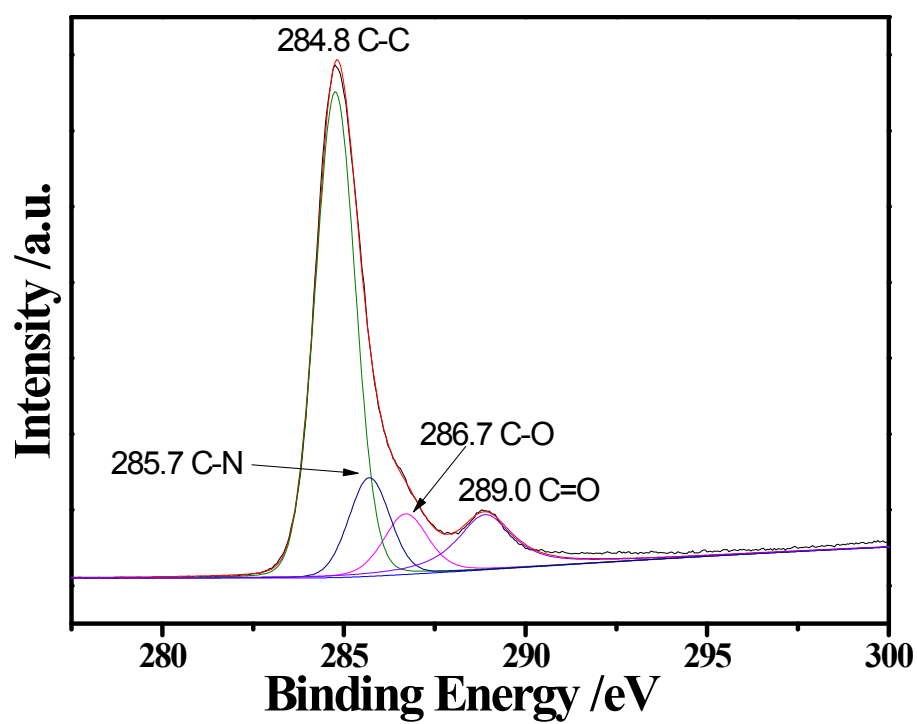

**Figure S3.** C1s spectrum of the N-doped Fe<sub>3</sub>C@C composites together with their corresponding fits.

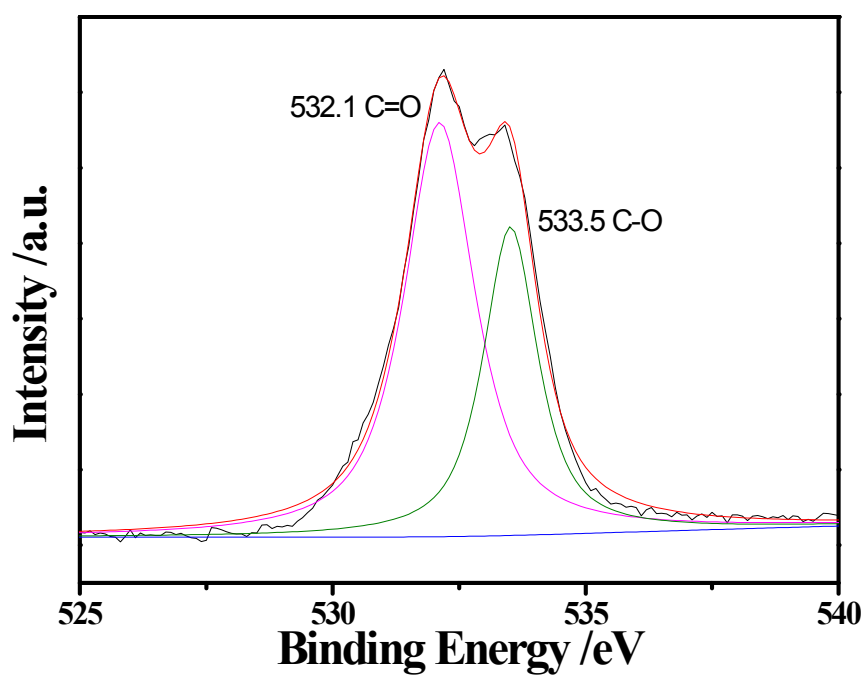

**Figure S4.** O1s spectrum of the N-doped Fe<sub>3</sub>C@C composites together with their corresponding fits.
